# Supplementary material
Source: publisher figshare collection journal article supplement (https://gsapubs.figshare.com/ndownloader/files/26855450)
Supplement: Supplementary file 1 [file 26855450]

## Sheet: Sheet1
Table S1. Zircon Cameca 1280 U-Pb data for the granitic rocks from the southeastern Fujian, coastal area of SE China.
	Concentrations [ppm]					Isotopic ratios							Isotopic Ages
Spots	U	Th	Pb	Th/U	f206%	207Pb*/206Pb	±s (%)	207Pb*/235U	±s (%)	206Pb*/238U	±s (%)	r	207Pb*/206Pb	±s	207Pb*/235U	±s	206Pb*/238U	±s	Discordance
08JH247@1	775.477	507.163	14.2987	0.654002	{0.13}	0.0485571	2.28876	0.0989979	2.75145	0.0147867	1.5271	0.555018	126.498	53.007	95.8509	2.51976	94.6235	1.4346	0.0129709
08JH247@2	611.557	460.784	11.6602	0.753459	{0.28}	0.0477835	3.40263	0.0981859	3.75027	0.0149029	1.5769	0.420476	88.5656	78.7404	95.1004	3.41032	95.3612	1.49285	-0.00273434
08JH247@3	452.642	352.734	8.92804	0.779279	{0.00}	0.0504267	2.58274	0.105903	3.00744	0.0152316	1.54083	0.512338	214.71	58.7435	102.211	2.92849	97.449	1.4904	0.0488623
08JH247@4	530.604	883.016	12.5	1.66417	{0.30}	0.0485413	2.44883	0.101452	2.92892	0.0151582	1.6068	0.548598	125.736	56.6586	98.1157	2.74296	96.9828	1.54684	0.0116817
08JH247@5	565.871	576.565	11.8372	1.0189	{0.00}	0.0490958	2.5929	0.103349	3.0068	0.0152673	1.5224	0.50632	152.409	59.6399	99.8635	2.86379	97.6756	1.47598	0.0223987
08JH247@6	580.673	477.41	11.3519	0.822167	{0.55}	0.0469968	3.91843	0.0974117	4.20398	0.0150329	1.52293	0.362258	49.0631	91.0128	94.3843	3.79615	96.1869	1.45414	-0.0187403
08JH247@7	717.942	494.395	13.6401	0.688629	{0.00}	0.0468516	2.12571	0.0982145	2.61576	0.0152037	1.52431	0.582742	41.6679	50.0675	95.1268	2.37807	97.2719	1.47177	-0.0220527
08JH247@8	709.861	463.575	13.7046	0.653051	{0.08}	0.0474901	2.30311	0.100891	2.74966	0.0154081	1.50211	0.54629	73.9417	53.8535	97.5987	2.56192	98.5696	1.46953	-0.00984999
08JH247@9	138.112	155.174	2.83647	1.12353	{0.22}	0.0491759	5.89639	0.100631	6.11856	0.0148416	1.63381	0.267026	156.227	132.501	97.3591	5.69625	94.9719	1.54047	0.0251355
08JH247@10	925.606	1768.63	22.968	1.91078	{0.12}	0.04766	2.14932	0.0996817	2.63002	0.0151691	1.51574	0.57632	82.426	50.2329	96.4825	2.42357	97.0521	1.4602	-0.00586904
08JH247@11	1254.29	2085.22	29.144	1.66248	{1.05}	0.0458168	3.3804	0.0928932	3.70245	0.0147047	1.5103	0.40792	-12.0124	79.7137	90.1949	3.20043	94.1026	1.41106	-0.0415262
08JH247@12	645.599	582.271	12.6899	0.901909	{0.18}	0.0483149	2.94936	0.0986039	3.32578	0.0148017	1.53691	0.462121	114.715	68.1388	95.4868	3.03547	94.7187	1.44526	0.00810928
08JH247@14	778.171	642.431	15.5927	0.825566	{0.32}	0.0479156	2.97145	0.100108	3.34334	0.0151526	1.53247	0.458363	95.1049	68.8863	96.8756	3.09388	96.9476	1.47474	-0.000742122
08JH247@15	564.142	482.881	11.3849	0.855957	{0.00}	0.0492155	2.41276	0.102942	2.86059	0.0151702	1.53674	0.537211	158.108	55.5084	99.4886	2.7146	97.0589	1.48054	0.0250333
08JH247@17	827.082	683.615	16.2396	0.826539	{0.34}	0.0488485	2.76385	0.101033	3.1509	0.0150007	1.51305	0.480196	140.566	63.6337	97.7299	2.94007	95.9829	1.44167	0.0182012
08JH247@18	599.357	491.181	11.683	0.819513	{0.20}	0.0477914	2.50433	0.0974821	2.93588	0.0147936	1.53224	0.5219	88.9538	58.3135	94.4495	2.65132	94.6672	1.44009	-0.00230007
08JH253@1	354.532	205.289	6.47864	0.579043	{0.23}	0.0467794	5.06012	0.09649	5.29035	0.0149598	1.54367	0.291791	37.9791	116.846	93.5312	4.73811	95.723	1.4669	-0.0228977
08JH253@4	99.5167	123.577	2.15073	1.24177	{0.49}	0.0447382	8.60235	0.0932406	8.76289	0.0151156	1.66969	0.190541	-69.8867	197.825	90.5176	7.61718	96.7122	1.60294	-0.0640512
08JH253@5	638.215	710.398	13.6183	1.1131	{0.09}	0.0492426	2.36821	0.106531	2.80362	0.0156905	1.50062	0.535244	159.397	54.4878	102.788	2.74442	100.362	1.49457	0.0241687
08JH253@6	269.325	209.43	5.20075	0.777609	{0.30}	0.0477516	4.64052	0.0979668	4.9122	0.0148796	1.61099	0.327956	86.978	106.503	94.8978	4.46015	95.2132	1.52278	-0.00331236
08JH253@7	110.743	155.874	2.40579	1.40754	{0.57}	0.0459449	5.97449	0.0927947	6.21295	0.0146482	1.70476	0.274388	-5.27484	138.198	90.1034	5.37106	93.7435	1.58673	-0.0388307
08JH253@9	123.116	200.146	2.89113	1.62567	{0.00}	0.0504481	5.67258	0.104792	5.86819	0.0150654	1.50249	0.25604	215.692	126.314	101.19	5.66752	96.3937	1.43769	0.0497573
08JH253@17	95.0081	115.936	2.23424	1.22027	{0.37}	0.0473463	7.6737	0.101272	8.12495	0.0155131	2.67003	0.328622	66.7305	173.174	97.9494	7.61502	99.2364	2.62989	-0.0129692
08JH253@15	351.84	246.562	6.60299	0.700778	{0.26}	0.0483066	4.50365	0.0983553	4.78761	0.0147669	1.6243	0.339272	114.312	102.943	95.257	4.36251	94.4977	1.52391	0.00803546
08JH253@14	77.8562	113.166	1.71369	1.45353	{1.09}	0.0485406	8.86993	0.101393	9.02767	0.0151496	1.68021	0.186118	125.702	196.495	98.0616	8.47389	96.9285	1.61662	0.0116902
08JH253@13	109.378	210.054	2.70994	1.92043	{0.97}	0.0488772	8.00838	0.101394	8.19522	0.0150454	1.73995	0.212313	141.945	177.9	98.062	7.68957	96.2664	1.66276	0.0186524
08JH253@12	108.376	158.083	2.38501	1.45865	>1e6	0.0481495	10.9053	0.0975119	11.0555	0.0146881	1.81606	0.164268	106.624	239.224	94.4771	10.023	93.9966	1.69487	0.00511103
08JH253@11	208.22	193.469	4.02501	0.929157	{0.53}	0.0467939	7.18206	0.093616	7.3688	0.0145097	1.64842	0.223703	38.7204	163.446	90.8663	6.42518	92.8638	1.51999	-0.0215097
08JH253@10	174.975	298.881	4.17002	1.70813	{0.29}	0.047263	5.4935	0.0983744	5.72879	0.0150959	1.62498	0.283652	62.5374	125.907	95.2747	5.22325	96.5873	1.55801	-0.0135898
08JH285@1	98.2375	157.59	3.47631	1.60418	{0.34}	0.0492657	6.09661	0.0989728	6.36393	0.0145704	1.82509	0.286787	160.493	136.711	95.8277	5.83622	93.2488	1.68985	0.0276555
08JH285@2	305.653	216.228	8.69325	0.70743	{0.00}	0.0485242	3.39185	0.0984449	3.73658	0.0147141	1.5676	0.419528	124.906	77.9755	95.3399	3.40602	94.162	1.46552	0.0125085
08JH285@3	133.698	142.373	4.25086	1.06489	{0.00}	0.0485413	4.99038	0.101354	5.25075	0.0151436	1.63293	0.31099	125.736	113.454	98.0256	4.91832	96.89	1.5705	0.0117202
08JH285@4	364.785	342.93	11.1816	0.940087	{0.00}	0.0464885	3.132	0.095907	3.49287	0.0149625	1.54619	0.44267	23.0293	73.5021	92.9912	3.10852	95.7399	1.46955	-0.0287105
08JH285@5	490.441	523.581	15.7303	1.06757	{0.10}	0.0493115	2.53646	0.103989	2.98555	0.0152945	1.57478	0.527466	162.667	58.2556	100.451	2.85948	97.8486	1.52945	0.0266009
08JH285@6	420.218	431.851	13.1107	1.02768	{0.00}	0.0470149	2.87943	0.0974866	3.2953	0.0150386	1.60246	0.486285	49.9865	67.3559	94.4537	2.97651	96.2234	1.53067	-0.018392
08JH285@7	99.8168	156.304	3.49377	1.56591	{0.51}	0.0476495	8.49135	0.0980116	8.64573	0.0149183	1.62658	0.188136	81.9	190.066	94.9393	7.86654	95.4591	1.54146	-0.00544508
08JH285@8	433.854	280.47	12.5165	0.646461	{0.00}	0.0472225	3.38634	0.0996681	3.80706	0.0153076	1.73967	0.456959	60.4933	78.7791	96.47	3.50966	97.9313	1.69103	-0.0149218
08JH285@9	226.054	313.158	7.70545	1.38533	{0.13}	0.0464241	3.87185	0.0956664	4.17713	0.0149456	1.56754	0.375266	19.7039	90.4514	92.7682	3.71007	95.6329	1.48819	-0.0299549
08JH285@10	150.725	107.83	4.42785	0.71541	{0.00}	0.0492646	7.23761	0.102191	7.47634	0.0150444	1.87421	0.250686	160.444	161.067	98.7965	7.0629	96.2602	1.79097	0.0263489
08JH285@11	160.547	106.785	4.68862	0.665133	{0.00}	0.0493034	4.43001	0.103715	4.68252	0.0152568	1.51691	0.323952	162.282	100.433	100.2	4.47766	97.609	1.46966	0.0265423
08JH285@12	164.434	102.764	4.71396	0.624957	{0.00}	0.0476246	4.41658	0.100491	4.73171	0.0153036	1.69793	0.35884	80.6589	101.637	97.2292	4.39671	97.9061	1.65003	-0.00691389
08JH285@14	112.442	88.7392	3.35367	0.7892	{1.64}	0.0514255	5.1545	0.106382	5.411	0.0150034	1.64622	0.304236	259.948	114.277	102.651	5.29667	95.9997	1.56885	0.0692803
08JH285@15	336.197	225.324	9.75199	0.670214	{0.30}	0.0482551	3.04793	0.101582	3.40324	0.0152677	1.51398	0.444864	111.793	70.4055	98.236	3.19158	97.6783	1.46785	0.00570939
08JH285@16	220.503	291.479	7.40485	1.32188	{0.23}	0.0472202	3.84674	0.0996559	4.14161	0.0153064	1.53477	0.370573	60.3793	89.2053	96.4587	3.81822	97.924	1.49172	-0.0149639
08JH285@18	486.44	496.004	15.3588	1.01966	{0.00}	0.0476045	4.57427	0.0997998	4.84343	0.0152048	1.59212	0.328718	79.6601	105.171	96.5915	4.47255	97.2787	1.53735	-0.00706332
91500@4	134.353	48.14	28.4051	1.69477	{0.00}	0.0741199	1.65437	1.8283	2.24406	0.178901	1.51621	0.675655	1044.73	33.0153	1055.67	14.8374	1060.97	14.8495	-0.00499147
91500@3	131.84	47.5087	27.8749	1.70435	{0.00}	0.0769337	2.02553	1.90626	2.53174	0.179707	1.51887	0.599929	1119.47	39.8826	1083.28	17.0031	1065.37	14.9324	0.0168082
91500@2	129.945	46.6496	27.0952	1.7217	{0.06}	0.0751863	1.59879	1.83895	2.19324	0.17739	1.50139	0.684554	1073.49	31.7809	1059.48	14.5288	1052.7	14.5986	0.00644499
91500@1	131.033	47.1646	27.1989	1.73406	{0.15}	0.074378	1.68637	1.80744	2.26627	0.176245	1.51398	0.668048	1051.74	33.6119	1048.15	14.9239	1046.43	14.6403	0.00164524
